# Supplementary material for: From the Phenomenology to the Mechanisms of Consciousness: Integrated Information Theory 3.0
Source: PubMed Central journal article supplement (PMC4014402; doi:10.1371/journal.pcbi.1003588), 2014-05-08
Supplement: pcbi.1003588.s001.pdf [file pcbi.1003588.s001.pdf]

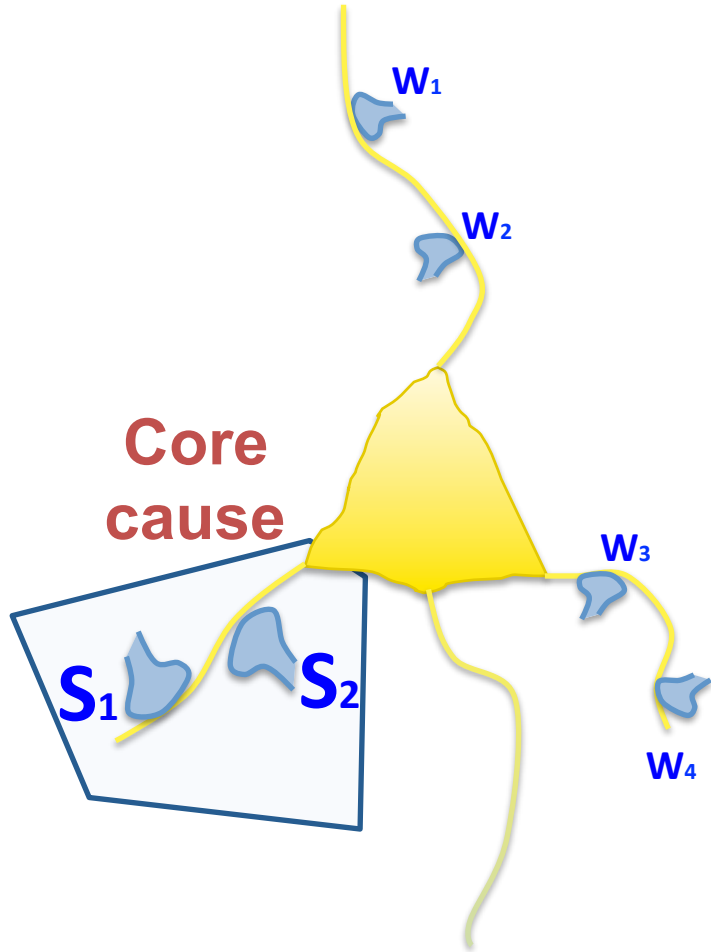

$$A^c / S_1^p \rightarrow (A^c / \square) \times (\square / S_1^p) \quad \varphi_{cause} = 0.44$$

$$A^c / W_1^p \rightarrow (A^c / \square) \times (\square / W_1^p) \quad \varphi_{cause} = 0.056$$

$$A^c / S_{1-2}^p \rightarrow (A^c / S_1^p) \times (\square / S_2^p) \quad \text{Core cause} \quad \varphi_{cause}^{Max} = 0.44$$

$$A^c / S_1 W_1^p \rightarrow (A^c / S_1^p) \times (\square / W_1^p) \quad \varphi_{cause} = 0.056$$

$$A^c / W_{1-2}^p \rightarrow (A^c / W_1^p) \times (\square / W_2^p) \quad \varphi_{cause} = 0.056$$

$$A^c / S_{1-2} W_1^p \rightarrow (A^c / S_{1-2}^p) \times (\square / W_1^p) \quad \varphi_{cause} = 0.056$$

$$A^c / S_1 W_{1-2}^p \rightarrow (A^c / S_1 W_1^p) \times (\square / W_2^p) \quad \varphi_{cause} = 0.056$$

$$A^c / W_{1-3}^p \rightarrow (A^c / W_{1-2}^p) \times (\square / W_3^p) \quad \varphi_{cause} = 0.056$$

⋮  
⋮  
⋮

$$A^c / S_{1-2} W_{1-4}^p \rightarrow (A^c / W_1^p) \times (\square / S_{1-2} W_{2-4}^p) \quad \varphi_{cause} = 0.056$$
